# Supplementary material for: Decorative Coatings of the Saint Demetrius Basarabov Reliquary’s Wooden Pedestal
Source: MDPI journal article supplement (doi:10.3390/coatings13122092), 2023-12-16
Supplement: s1 [file s1]

Archive with 1 entries (1 files):
- coatings-2683339-supplementary.pdf
